# Supplementary material for: The influence of protonation on molecular structure and physico-chemical properties of gossypol Schiff bases
Source: Royal Society of Chemistry journal article supplement (doi:10.1039/c0ob00288g), 2010-01-01
Supplement: c0ob00288g.pdf [file c0ob00288g.pdf]

## Supplementary Data

### The influence of protonation on molecular structure and physico-chemical properties of gossypol Schiff bases

Piotr Przybylski<sup>a\*</sup>, Krystian Pyta<sup>a</sup>, Justyna Czupryniak<sup>b</sup>, Barbara Wicher<sup>a</sup>,  
Maria Gdaniec<sup>a</sup>, Tadeusz Ossowski<sup>b</sup>, Bogumił Brzezinski<sup>a</sup>

<sup>a</sup>Faculty of Chemistry, Adam Mickiewicz University, 60-780 Poznań, Grunwaldzka 6, Poland,

<sup>b</sup>Faculty of Chemistry, University of Gdańsk, Sobieskiego 18, 80-952 Gdańsk, Poland

\* E-mail: [piotrp@amu.edu.pl](mailto:piotrp@amu.edu.pl), Fax: +48 061 829 1505, Phone +48 61 8291252

#### Table of contents

1. Elemental analysis data of **S1** and **S2** as well as their protonated species.
2. Structure of **S2** in crystal.

**Fig. 1S.** The FT-IR spectra of the crystals of gossypol (red line) in KBr pellet and crystals of **S1** (black line) and **S2** (blue line) in the nujol-fluorolube mull (compilation) in the ranges: a) 4000-400 cm<sup>-1</sup>, b) 1800-1500 cm<sup>-1</sup>.

**Fig 2S.** Comparison of the FT-IR spectra of **S1** and **S2** in acetonitrile in the range 1700-1475 cm<sup>-1</sup>.

**Fig. 3S.** The FT-IR spectra of **S1** (black line), **S1:H<sup>+</sup>** (blue line) and **S1:2H<sup>+</sup>** (red line) recorded in acetonitrile in the ranges: a) 4000-1800 cm<sup>-1</sup>, b) 1700-1475 cm<sup>-1</sup>.

**Fig. 4S.** The lowest-energy structures of the protonated **S1** Schiff base: a) **S2:H<sup>+</sup>**, b) **S2:2H<sup>+</sup>**, calculated by the PM5 method at semi-empirical level of theory; the excess protons are marked by yellow.

**Fig. 5S.** Comparison of the dihedral angle ( $\omega$ ) found in the structure of unprotonated **S2** (X-ray) with the dihedral angle calculated for monoprotonated **S2** (PM5).

**Fig. 6S.** a) Centrosymmetric dimer of **S2** formed *via* O<sub>5</sub>-H...O<sub>3</sub> hydrogen bonds; b) Two-dimensional assembly of **S2** molecules *via* hydrogen bonds.

**Table 1S.** Crystal data and some details of data collection and structure refinement for **S2**.

**Table 2S.** Torsion angles (°) describing conformation of the trimethylene linkers and conformation of the morpholine fragments within **S2**.

**Table 3S.** Geometrical parameters (Å, °) of inter- or intramolecular hydrogen bonds in the crystal of **S2**.

**Table 4S.** The statistical parameters of models 1°-4° tested for **S1** and **S2** protonated species.

**Table 5S.**  $\Delta H_f^\circ$  values (kcal/mol) determined for the structures of **S1** and **S2** protonated molecules at different sites considered.

## 1. Elemental analysis data of **S1** and **S2** as well as their protonated species.

**S1** - C<sub>36</sub>H<sub>40</sub>N<sub>2</sub>O<sub>6</sub>                      Calculated: C=72.46%, H=6.76%, N=4.69%;  
Found:            C=72.44%, H=6.72%, N=4.68%.

**S1**+HClO<sub>4</sub> - C<sub>36</sub>H<sub>41</sub>ClN<sub>2</sub>O<sub>10</sub>            Calculated: C=62.02%, H=5.93%, N=4.02%;  
Found:            C=62.00%, H=5.90%, N=3.99%.

**S1**+2HClO<sub>4</sub> - C<sub>36</sub>H<sub>42</sub>Cl<sub>2</sub>N<sub>2</sub>O<sub>14</sub>        Calculated: C=54.21%, H=5.31%, N=3.51%;  
Found:            C=54.17%, H=5.30%, N=3.48%.

---

**S2** - C<sub>44</sub>H<sub>58</sub>N<sub>4</sub>O<sub>8</sub>                      Calculated: C=68.55%, H=7.58%, N=7.27%;  
Found:            C=68.51%, H=7.53%, N=7.25%.

**S2**+HClO<sub>4</sub> - C<sub>44</sub>H<sub>59</sub>ClN<sub>4</sub>O<sub>12</sub>            Calculated: C=60.65%, H=6.82%, N=6.43%;  
Found:            C=60.63%, H=6.79%, N=6.44%.

**S2**+2HClO<sub>4</sub> - C<sub>44</sub>H<sub>60</sub>Cl<sub>2</sub>N<sub>4</sub>O<sub>16</sub>        Calculated: C=54.38%, H=6.22%, N=5.76%;  
Found:            C=54.33%, H=6.18%, N=5.75%.

**S2**+3HClO<sub>4</sub> - C<sub>44</sub>H<sub>61</sub>Cl<sub>3</sub>N<sub>4</sub>O<sub>20</sub>        Calculated: C=49.28%, H=5.73%, N=5.22%;  
Found:            C=49.22%, H=5.70%, N=5.21%.

**S2**+4HClO<sub>4</sub> - C<sub>44</sub>H<sub>62</sub>Cl<sub>4</sub>N<sub>4</sub>O<sub>24</sub>        Calculated: C=45.06%, H=5.33%, N=4.78%;  
Found:            C=45.03%, H=5.31%, N=4.73%.

Analysis of **S1** and **S2** as well as their protonated species was carried out on Vario ELIII  
(Elementar, Germany).

## 2. Structure of **S2** in crystal

The conformations of propylene linkers in **S2** are also different from those observed in an analogous derivative with the pyrrolidin-2-one fragment replacing the morpholine unit<sup>24</sup>. As indicated in the Experimental, one of the morpholine groups is disordered over two positions with equal occupancies and this disorder is strictly related to the crystal packing. The two disordered groups from two different molecules are in close contact and the pattern of disorder requires that whenever one group assumes one of the disordered orientations, the other has to assume the alternative one.

In the **S2** molecule in crystal there are four intramolecular hydrogen bonds, two strong ones involving the amine H-atoms and two much weaker ones involving hydroxyls O<sub>4</sub>—H and O<sub>6</sub>—H (**Fig. 1, Table 3S**). In the FT-IR spectrum of **S2** the band of  $\nu(\text{O-H})$  vibrations of the weaker hydrogen-bonded groups O<sub>4</sub>—H $\cdots$ O<sub>3</sub> and O<sub>6</sub>—H $\cdots$ O<sub>7</sub> (**Fig. 1S**) is present at 3319 cm<sup>-1</sup>. The absorption of the  $\nu(\text{N-H})$  vibrations in the respective spectrum of **S2** should be observed below 3000 cm<sup>-1</sup>. The fact that this absorption is not well visible in the spectrum of **S2** can be explained by the coupling of changes in the  $\pi$ -electron distribution of naphthalene ring with the NH proton vibration in the hydrogen bridge. The band assigned to non-bonded intramolecularly O<sub>1</sub>—H and O<sub>5</sub>—H groups is visible at about 3500 cm<sup>-1</sup> in the spectrum shown in **Fig. 1S**. A comparison of the absorption of these bands in solid (**Fig. 1S**) and in solution (**Fig. 3a**) reveals that some of these hydroxyl groups in the structure of **S2** in the crystal are involved in stronger intermolecular interactions, whereas in the structure of **S2** in the solution both O<sub>1</sub>—H and O<sub>5</sub>—H groups are weakly hydrogen-bonded with the solvent molecules.

There are two types of intermolecular hydrogen-bond motifs generally formed in crystals of gossypol Schiff bases: the centrosymmetric dimer through a pair of O<sub>5</sub>-H $\cdots$ O<sub>3</sub> hydrogen bonds and the dimer made through a cyclic  $R_2^2(10)$  motif<sup>20, 22-31</sup>. In **S2** only the former one is realized (**Fig. 6Sa**), leaving the carbonyl oxygen atom O<sub>7</sub> and the hydroxyl group O<sub>6</sub>-H not involved in intermolecular hydrogen bonding, a quite exceptional case among gossypol Schiff bases<sup>20, 22-31</sup>. These two groups C<sub>17</sub>=O<sub>7</sub> and O<sub>6</sub>-H are in a close proximity of the disordered morpholine fragment and of the C<sub>15</sub>-C<sub>20</sub> ring, with the C<sub>15</sub>-C<sub>20</sub> centroid and O<sub>7</sub> carbonyl atom at the distance of 3.31 Å. The same naphthalene unit, but its second half, forms another short O $\cdots$  $\pi$  contact of 3.04 Å with the O<sub>2</sub> atom from the ordered morpholine group. This last short contact emerges, most probably, as a result of sterical requirements of the O<sub>1</sub>-

H...O<sub>2</sub> hydrogen bond joining hydroxyl group of one **S2** molecule with the morpholine O atom of another one. This hydrogen bond requires an acceptor atom approaching the donor group to be located directly above the naphthalene  $\pi$  system.

In crystal the O<sub>1</sub>-H...O<sub>2</sub> interaction bridging the neighbouring **S2** dimers furnish a two-dimensional network (**Fig. 6Sb**) parallel to (100).

As follows from the X-ray data there are also short intramolecular H...H and C-H...O contacts between the substituents on the naphthalene ring (H<sub>4</sub>...H<sub>23</sub> 1.88 Å, H<sub>14</sub>...H<sub>28</sub> 1.94 Å, H<sub>27</sub>...O<sub>5</sub> 2.02 Å, H<sub>22</sub>...O<sub>1</sub> 1.99 Å). The naphthalene rings are almost planar with the root mean square deviation of the atoms from their best planes being 0.0073 Å for the C<sub>1</sub>-C<sub>10</sub> unit and 0.032 Å for the C<sub>11</sub>-C<sub>20</sub> unit. Furthermore, the dihedral angle ( $\omega$ ) between the least-square planes of the naphthalene moieties is 89.09(1)° so they are almost perpendicular to each other.

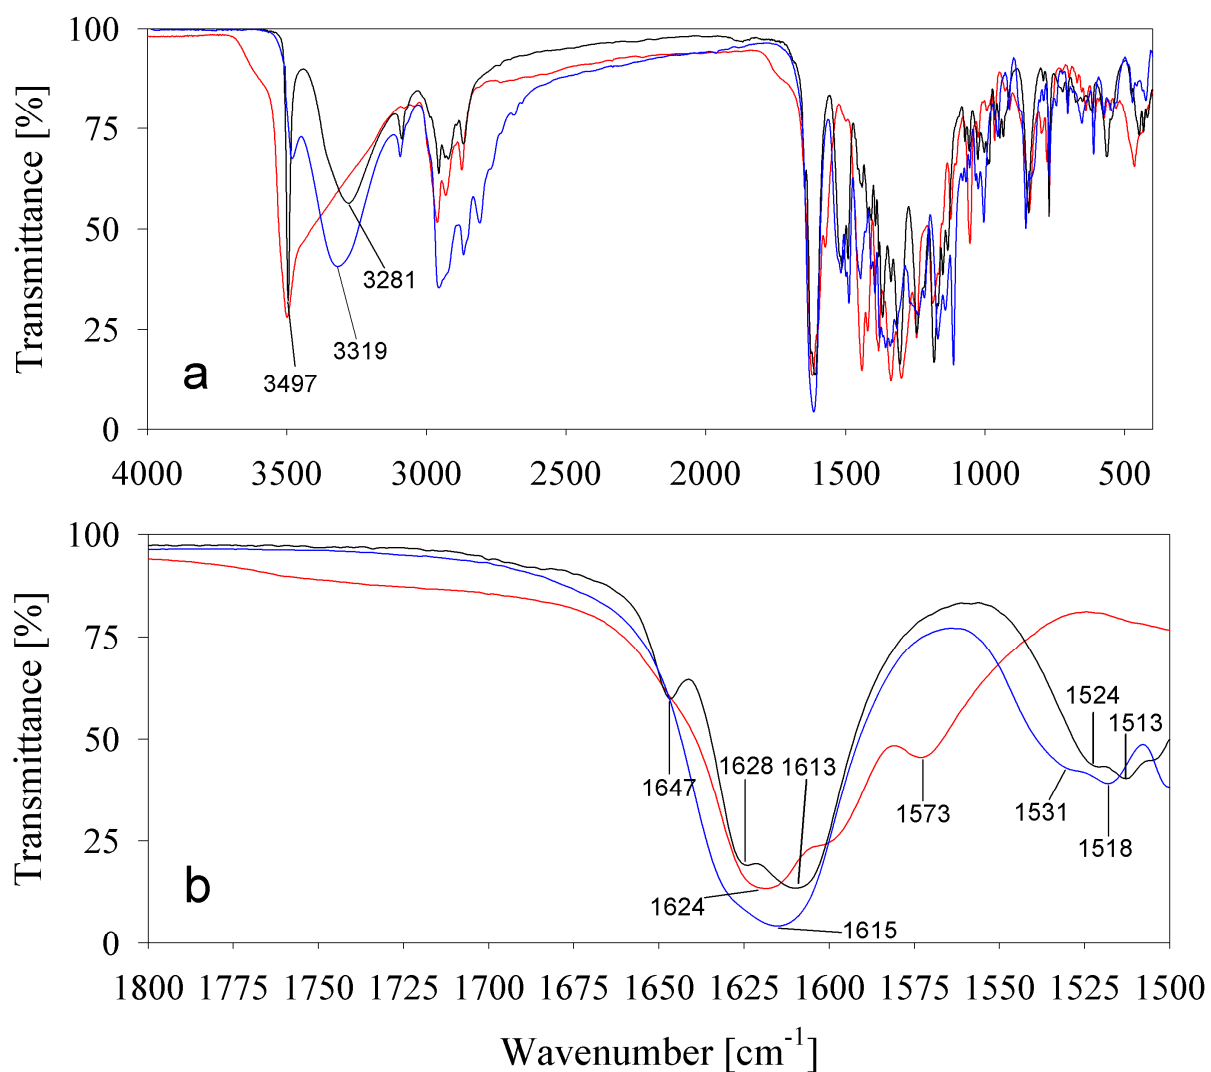

**Figure 1S.** The FT-IR spectra of the crystals of gossypol (red line) in KBr pellet and crystals of S1 (black line) and S2 (blue line) in the nujol-fluorolube mull (compilation) in the ranges: a) 4000-400 cm<sup>-1</sup>, b) 1800-1500 cm<sup>-1</sup>.

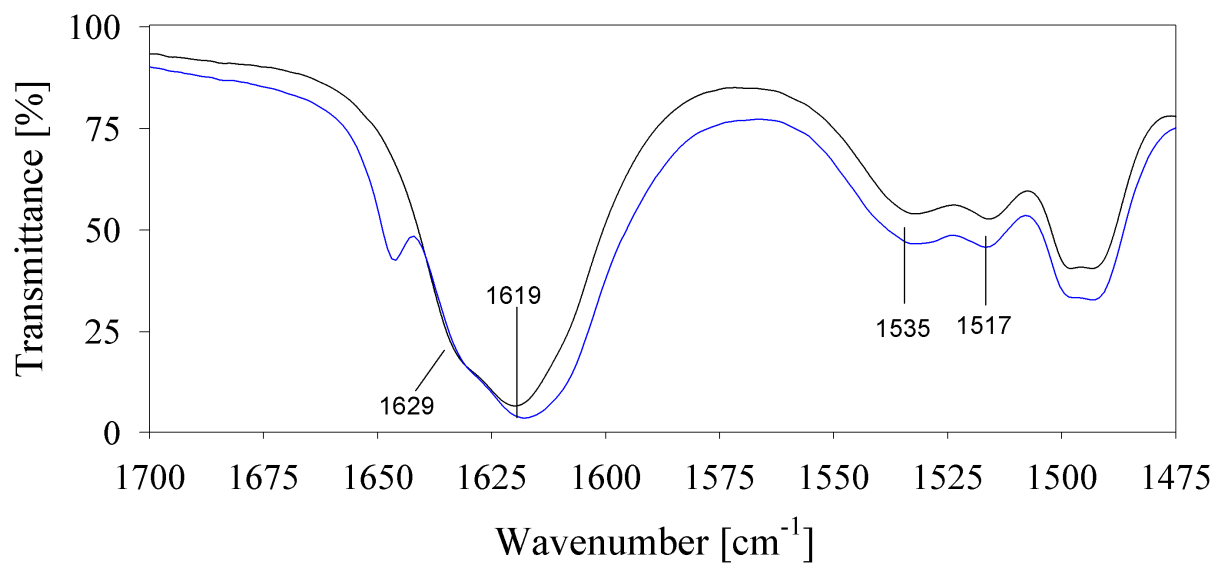

**Figure 2S.** Comparison of the FT-IR spectra of **S1** and **S2** in acetonitrile in the range 1700-1475  $\text{cm}^{-1}$ .

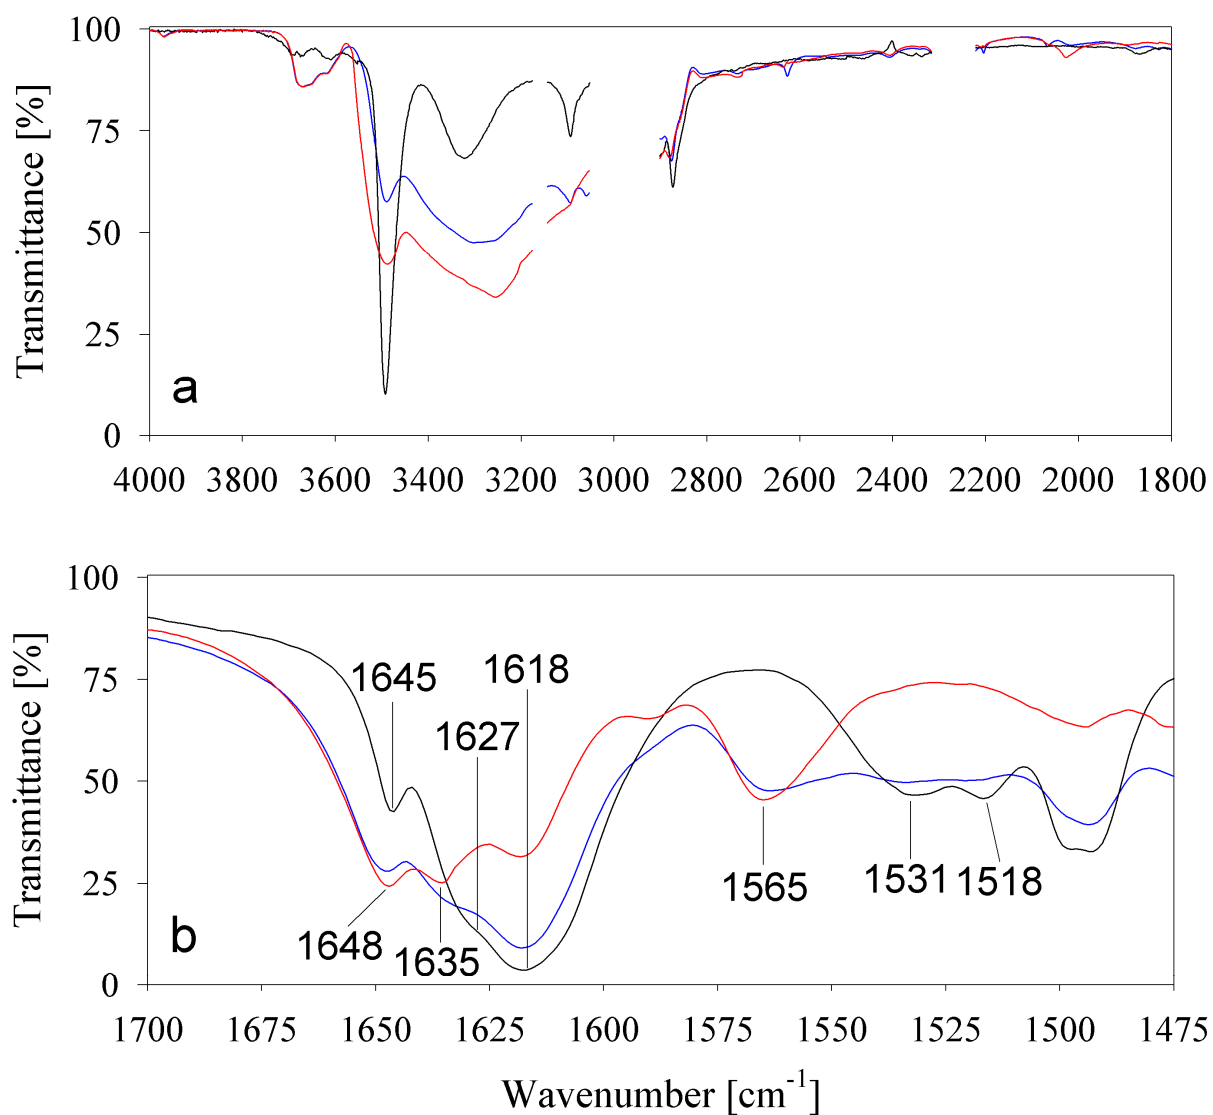

**Figure 3S.** The FT-IR spectra of **S1** (black line), **S1:H<sup>+</sup>** (blue line) and **S1:2H<sup>+</sup>** (red line) recorded in acetonitrile in the ranges: a) 4000-1800 cm<sup>-1</sup>, b) 1700-1475 cm<sup>-1</sup>.

a)

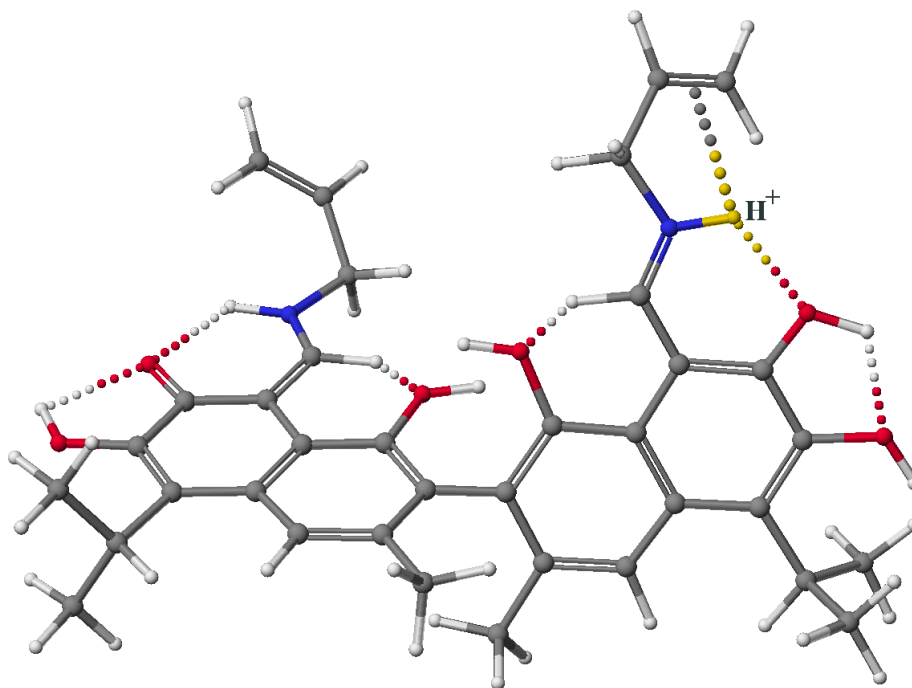

b)

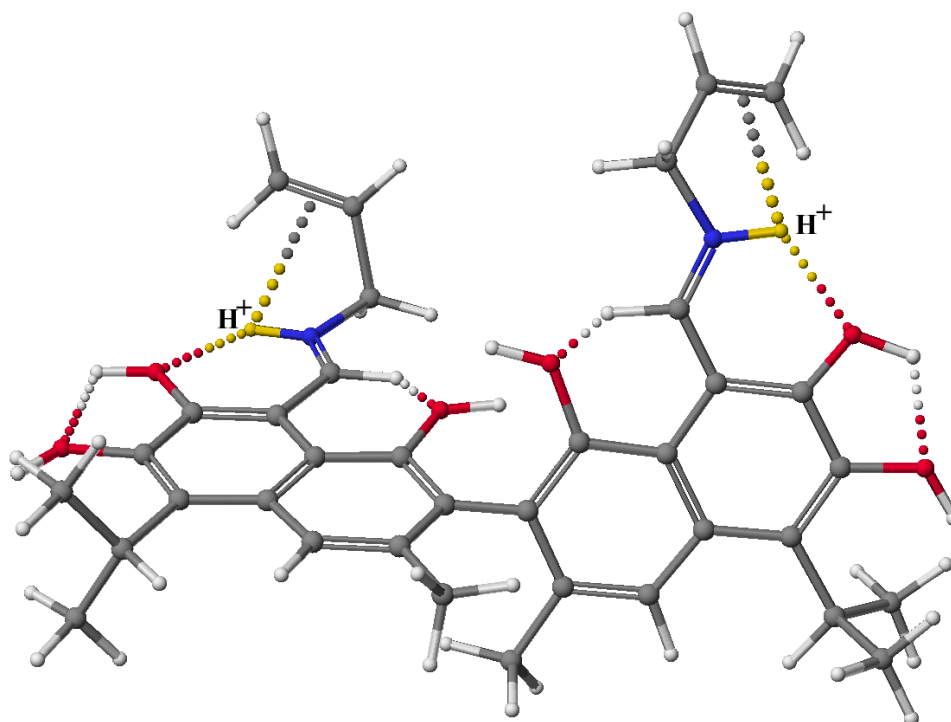

**Figure 4S.** The lowest-energy structures of the protonated **S1** Schiff base: a) **S2:H<sup>+</sup>**, b) **S2:2H<sup>+</sup>**, calculated by the PM5 method at semi-empirical level of theory; the excess protons are marked by yellow.



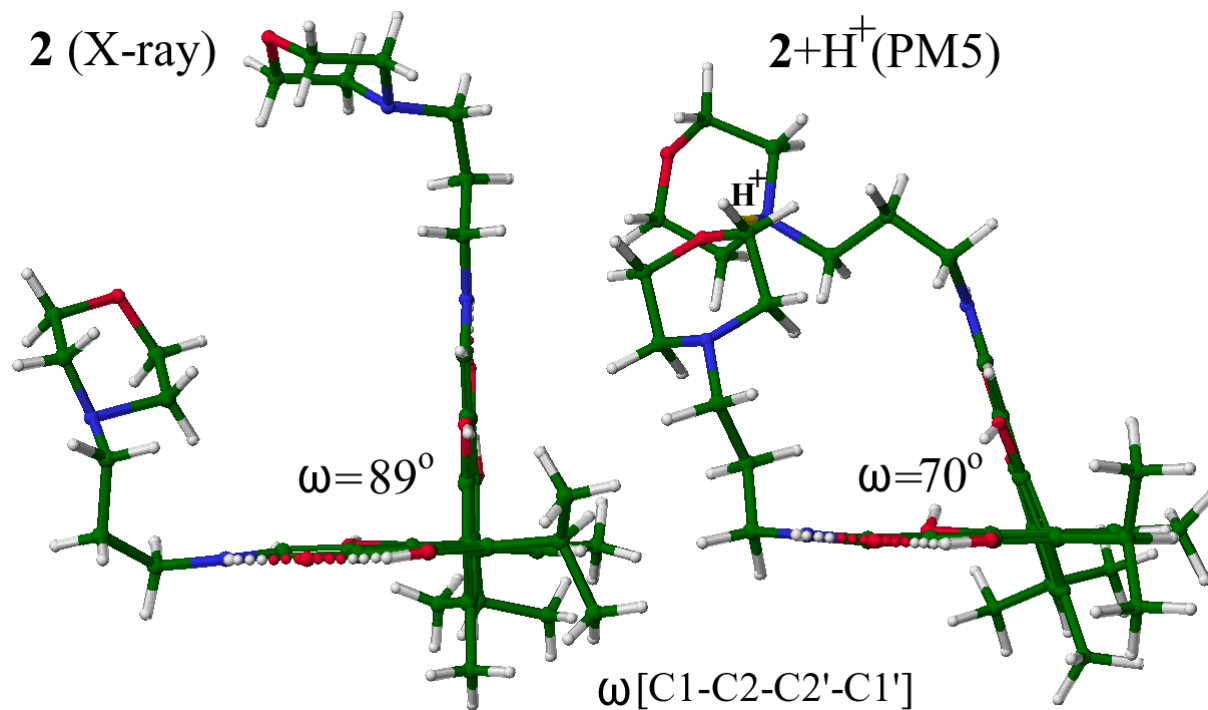

**Figure 5S.** Comparison of the diedral angles ( $\omega$ ) found in the structures of unprotonated **S2** (X-ray) and monoprotated **S2** (PM5).

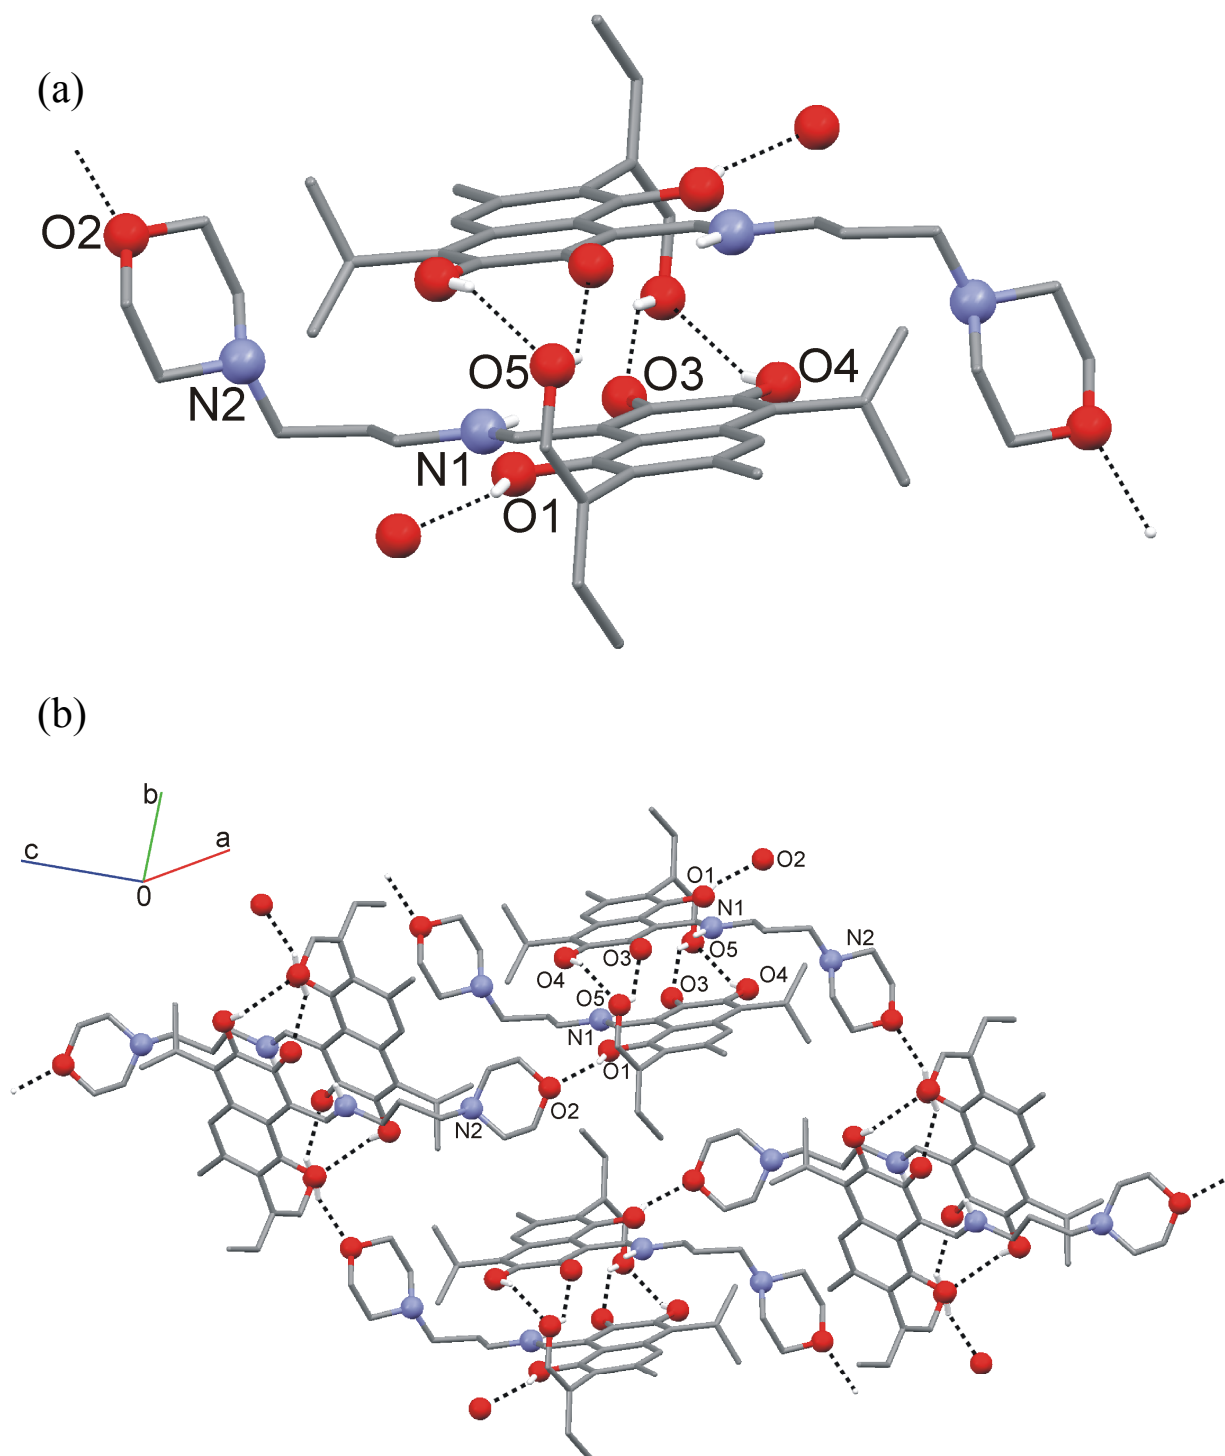

**Figure 6S.** (a) Two-dimensional assembly of S2 molecules *via* hydrogen bonds.  
(b) Centrosymmetric dimer of S2 formed *via* O<sub>5</sub>-H...O<sub>3</sub> hydrogen bonds.

**Table 1S.** Crystal data and some details of data collection and structure refinement for **S2**.

|                                                             |                                                               |
|-------------------------------------------------------------|---------------------------------------------------------------|
| Empirical formula                                           | C <sub>44</sub> H <sub>58</sub> N <sub>4</sub> O <sub>8</sub> |
| Formula weight                                              | 770.94                                                        |
| Temperature (K)                                             | 105 (2)                                                       |
| Wavelength (Å)                                              | 1.54184                                                       |
| Crystal system                                              | monoclinic                                                    |
| Space group                                                 | C 2/c                                                         |
| Unit cell dimensions                                        |                                                               |
| a (Å)                                                       | 37.523(3)                                                     |
| b (Å)                                                       | 11.2668(6)                                                    |
| c (Å)                                                       | 21.482(2)                                                     |
| β (°)                                                       | 120.07(1)                                                     |
| Volume (Å <sup>3</sup> )                                    | 7859.2(9)                                                     |
| Z                                                           | 8                                                             |
| Density calculated (g/cm <sup>3</sup> )                     | 1.303                                                         |
| F(000)                                                      | 3312                                                          |
| Crystal size (mm)                                           | 0.35 x 0.1 x 0.01                                             |
| θ range for data collection (°)                             | 2.56 – 76.06                                                  |
| Limiting indices                                            | -44 ≤ h ≤ 45, -12 ≤ k ≤ 13, -25 ≤ l ≤ 22                      |
| Reflection collected/unique                                 | 18723/7176                                                    |
| Data/restraints/parameters                                  | 7176/0/561                                                    |
| Completeness θ = 68.25 °                                    | 99.4 %                                                        |
| Goodness-of-fit on F <sup>2</sup>                           | 1.031                                                         |
| Final R indices [I > 2σ(I)]                                 | R <sub>1</sub> = 0.0486 wR <sub>2</sub> = 0.1298              |
| R indices (all data)                                        | R <sub>1</sub> = 0.0844 wR <sub>2</sub> = 0.1480              |
| Δρ <sub>max</sub> and Δρ <sub>min</sub> (eÅ <sup>-3</sup> ) | 0.248 and -0.275                                              |

**Table 2S.** Torsion angles (°) describing conformation of the trimethylene linkers and conformation of the morpholine fragments within **S2**.

| Torsion angle  |            | Torsion angle      |            |
|----------------|------------|--------------------|------------|
| C22-N1-C31-C32 | -179.4 (2) | C27-N3-C38-C39     | -149.2 (2) |
| N1-C31-C32-C33 | 173.8 (2)  | N3-C38-C39-C40     | 63.8 (3)   |
| C31-C32-C33-N2 | -69.0 (3)  | C38-C39-C40-N4     | 68.5 (3)   |
| C34 N2 C33 C32 | -85.9(2)   | C41 N4 C40 C39     | -100.8(3)  |
| C37 N2 C33 C32 | 153.7(2)   | C44 N4 C40 C39     | 148.0(5)   |
|                |            | C41' N4 C40 C39    | -167.1(4)  |
|                |            | C44' N4 C40 C39    | 81.5(3)    |
| C37 N2 C34 C35 | -59.6(3)   | C44 N4 C41 C42     | -63.5(6)   |
| N2 C34 C35 O2  | 58.9(3)    | N4 C41 C42 O8      | 58.3(7)    |
| C34 C35 O2 C36 | -55.7(3)   | C41 C42 O8 C43     | -53.7(9)   |
| C35 O2 C36 C37 | 55.0(3)    | C42 O8 C43 C44     | 53.6(9)    |
| O2 C36 C37 N2  | -58.4(3)   | O8 C43 C44 N4      | -64.3(9)   |
| C36 C37 N2 C34 | 60.4(3)    | C43 C44 N4 C41     | 64.3(8)    |
|                |            | C44' N4 C41' C42'  | -57.2(7)   |
|                |            | N4 C41' C42' O8'   | 63.4(9)    |
|                |            | C41' C42' O8' C43' | -58.7(9)   |
|                |            | C42' O8' C43' C44' | 58.9(7)    |
|                |            | O8' C43' C44' N4   | -59.3(6)   |
|                |            | C43' C44' N4 C41'  | 56.3(5)    |

**Table 3S.** Geometrical parameters ( $\text{\AA}$ ,  $^\circ$ ) of inter- or intramolecular hydrogen bonds in the crystal of **S2**.

| D-H...A                                          | d(D-H) | d(H...A) | d(D-A)   | $\angle(\text{D-H...A})$ |
|--------------------------------------------------|--------|----------|----------|--------------------------|
| O <sub>4</sub> -H...O <sub>3</sub>               | 0.82   | 2.09     | 2.575(2) | 118                      |
| O <sub>6</sub> -H...O <sub>7</sub>               | 0.82   | 2.05     | 2.546(2) | 118                      |
| N <sub>1</sub> -H...O <sub>3</sub>               | 0.86   | 1.89     | 2.559(2) | 133                      |
| N <sub>3</sub> -H...O <sub>7</sub>               | 0.86   | 1.88     | 2.550(3) | 134                      |
| O <sub>1</sub> -H...O <sub>2</sub> <sup>i</sup>  | 0.82   | 2.02     | 2.734(2) | 145                      |
| O <sub>5</sub> -H...O <sub>3</sub> <sup>ii</sup> | 0.82   | 2.06     | 2.720(2) | 137                      |

Symmetry code: (i)  $-x+1/2, y+1/2, -z+1/2$ ; (ii)  $-x+1/2, -y+1/2, -z+1$ .

**Table 4S.** The statistical parameters of models 1°-4° tested for **S1** and **S2** protonated species.

|                           | Compound <b>S1</b> |          | Compound <b>S2</b> |          |          |          |
|---------------------------|--------------------|----------|--------------------|----------|----------|----------|
|                           | model 1°           | model 2° | model 1°           | model 2° | model 3° | model 4° |
| Standard deviation in EMF | 27.19              | 9.91     | 77.26              | 77.60    | 28.29    | 14.48    |
| $\Delta BIC$              | 0.48               | 0.4      | 0.93               | 0.93     | 0.5      | 0.2      |

EMF – electromotive force. Difference between potential measured and calculated,

$\Delta BIC$ - Bayesian Information Criteria.  $BIC = n \cdot \log \frac{RSS}{n} + k \cdot \log(n)$  and

$$\Delta BIC_i = BIC_i - BIC^{\min}$$

**Table 5S.**  $\Delta H_f^\circ$  values (kcal/mol) determined for the structures of **S1** and **S2** protonated molecules at different sites considered.

| Structure calculated                                        | Stoichiometry              | $\Delta H_f^\circ$<br>(kcal/mol) |
|-------------------------------------------------------------|----------------------------|----------------------------------|
| <b>S1</b> <sub>en-en</sub> -H <sup>+</sup> (A)              | <b>S1</b> -H <sup>+</sup>  | -1.12                            |
| <b>S1</b> <sub>im-en</sub> -H <sup>+</sup> (A) Fig 4Sa      |                            | -7.89                            |
| <b>S1</b> <sub>en-en</sub> -H <sup>+</sup> (B)              |                            | -4.12                            |
| <b>S1</b> <sub>im-en</sub> -H <sup>+</sup> (B)              |                            | -5.11                            |
| <b>S1</b> <sub>en-en</sub> -H <sup>+</sup> (C)              |                            | +7.14                            |
| <b>S1</b> <sub>im-en</sub> -H <sup>+</sup> (C)              |                            | +6.52                            |
| <b>S1</b> <sub>en-en</sub> -H <sup>+</sup> (D)              |                            | +5.74                            |
| <b>S1</b> <sub>im-im</sub> -H <sup>+</sup> (D)              |                            | +4.11                            |
| <b>S1</b> <sub>en-en</sub> -H <sup>+</sup> (G)              |                            | -0.17                            |
| <b>S1</b> <sub>im-en</sub> -H <sup>+</sup> (G)              |                            | -0.22                            |
| <b>S1</b> <sub>en-en</sub> -2H <sup>+</sup> (A, A')         | <b>S1</b> -2H <sup>+</sup> | -3.85                            |
| <b>S1</b> <sub>im-im</sub> -2H <sup>+</sup> (A, A') Fig 4Sb |                            | -12.73                           |
| <b>S1</b> <sub>en-en</sub> -2H <sup>+</sup> (B, B')         |                            | -7.53                            |
| <b>S1</b> <sub>im-im</sub> -2H <sup>+</sup> (B, B')         |                            | -9.11                            |
| <b>S1</b> <sub>en-en</sub> -2H <sup>+</sup> (C, C')         |                            | +10.11                           |
| <b>S1</b> <sub>im-im</sub> -2H <sup>+</sup> (C, C')         |                            | +8.29                            |
| <b>S1</b> <sub>en-en</sub> -2H <sup>+</sup> (D, D')         |                            | +6.73                            |
| <b>S1</b> <sub>im-im</sub> -2H <sup>+</sup> (D, D')         |                            | +6.18                            |
| <b>S1</b> <sub>en-en</sub> -2H <sup>+</sup> (G, G')         |                            | -2.32                            |
| <b>S1</b> <sub>im-im</sub> -2H <sup>+</sup> (G, G')         |                            | -2.54                            |
| <b>S2</b> <sub>en-en</sub> -H <sup>+</sup> (A)              | <b>S2</b> -H <sup>+</sup>  | -1.26                            |
| <b>S2</b> <sub>im-en</sub> -H <sup>+</sup> (A)              |                            | -5.73                            |
| <b>S2</b> <sub>en-en</sub> -H <sup>+</sup> (B)              |                            | -3.59                            |
| <b>S2</b> <sub>im-en</sub> -H <sup>+</sup> (B)              |                            | -4.02                            |
| <b>S2</b> <sub>en-en</sub> -H <sup>+</sup> (C)              |                            | +8.34                            |
| <b>S2</b> <sub>im-en</sub> -H <sup>+</sup> (C)              |                            | +7.92                            |
| <b>S2</b> <sub>en-en</sub> -H <sup>+</sup> (D)              |                            | +5.92                            |
| <b>S2</b> <sub>im-im</sub> -H <sup>+</sup> (D)              |                            | +5.19                            |
| <b>S2</b> <sub>en-en</sub> -H <sup>+</sup> (E) Fig 4a       |                            | -12.42                           |
| <b>S2</b> <sub>im-en</sub> -H <sup>+</sup> (E)              |                            | -10.71                           |
| <b>S2</b> <sub>en-en</sub> -H <sup>+</sup> (F)              | -4.11                      |                                  |
| <b>S2</b> <sub>im-en</sub> -H <sup>+</sup> (F)              | -4.86                      |                                  |
| <b>S2</b> <sub>en-en</sub> -2H <sup>+</sup> (A, A')         | <b>S2</b> -2H <sup>+</sup> | -2.08                            |
| <b>S2</b> <sub>im-im</sub> -2H <sup>+</sup> (A, A')         |                            | -11.74                           |
| <b>S2</b> <sub>en-en</sub> -2H <sup>+</sup> (B, B')         |                            | -7.35                            |
| <b>S2</b> <sub>im-im</sub> -2H <sup>+</sup> (B, B')         |                            | -9.17                            |
| <b>S2</b> <sub>en-en</sub> -2H <sup>+</sup> (C, C')         |                            | +15.98                           |
| <b>S2</b> <sub>im-im</sub> -2H <sup>+</sup> (C, C')         |                            | +13.84                           |
| <b>S2</b> <sub>en-en</sub> -2H <sup>+</sup> (D, D')         |                            | +13.26                           |
| <b>S2</b> <sub>im-im</sub> -2H <sup>+</sup> (D, D')         |                            | +13.03                           |
| <b>S2</b> <sub>en-en</sub> -2H <sup>+</sup> (E, E') Fig 4b  |                            | -20.03                           |
| <b>S2</b> <sub>im-im</sub> -2H <sup>+</sup> (E, E')         |                            | -16.45                           |
| <b>S2</b> <sub>en-en</sub> -2H <sup>+</sup> (F, F')         | -7.42                      |                                  |
| <b>S2</b> <sub>im-im</sub> -2H <sup>+</sup> (F, F')         | -8.06                      |                                  |

The sites of protonation considered:

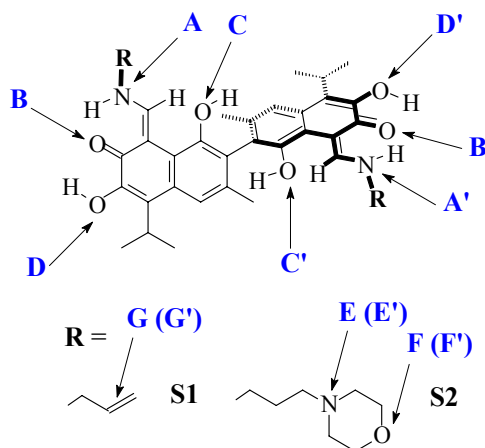

**S1**<sub>en-en</sub> - Schiff base in the enamine-enamine tautomeric form, **S1**<sub>en-im</sub> -the Schiff base in the enamine-imine tautomeric form, **S1**<sub>im-im</sub> - Schiff base in the imine-imine tautomeric form;  $H_f^\circ$  = standard enthalpy of formation  
 $\Delta H_f^\circ = H_{f^\circ}^{\text{bonded}} - H_{f^\circ}^{\text{non-bonded}}$ , where  $H_{f^\circ}^{\text{bonded}}$  = proton and the Schiff base molecule are bonded to each other;  $H_{f^\circ}^{\text{non-bonded}}$  = proton and the Schiff base are distanced to each other above 30Å.

| Structure calculated                                                                             | Stoichiometry            | $\Delta H_f^\circ$<br>(kcal/mol) |
|--------------------------------------------------------------------------------------------------|--------------------------|----------------------------------|
| <b>S2<sub>en-en</sub>-3H<sup>+</sup></b> (A, A', D)                                              | <b>S2-3H<sup>+</sup></b> | -0.73                            |
| <b>S2<sub>im-im</sub>-3H<sup>+</sup></b> (A, A', D)                                              |                          | -6.59                            |
| <b>S2<sub>en-en</sub>-3H<sup>+</sup></b> (B, B', C)                                              |                          | +3.58                            |
| <b>S2<sub>im-im</sub>-3H<sup>+</sup></b> (B, B', C)                                              |                          | +1.94                            |
| <b>S2<sub>en-im</sub>-3H<sup>+</sup></b> (B, B', C)                                              |                          | +2.44                            |
| <b>S2<sub>en-en</sub>-3H<sup>+</sup></b> (C, C', A)                                              |                          | +11.93                           |
| <b>S2<sub>im-im</sub>-3H<sup>+</sup></b> (C, C', A)                                              |                          | +10.31                           |
| <b>S2<sub>en-im</sub>-3H<sup>+</sup></b> (C, C', A)                                              |                          | +9.98                            |
| <b>S2<sub>en-en</sub>-3H<sup>+</sup></b> (D, D', A)                                              |                          | +10.27                           |
| <b>S2<sub>im-im</sub>-3H<sup>+</sup></b> (D, D', A)                                              |                          | +9.25                            |
| <b>S2<sub>en-im</sub>-3H<sup>+</sup></b> (D, D', A)                                              |                          | +7.14                            |
| <b>S2<sub>en-en</sub>-3H<sup>+</sup></b> (E, E', A)                                              |                          | -24.81                           |
| <b>S2<sub>im-im</sub>-3H<sup>+</sup></b> (E, E', A)                                              |                          | -25.15                           |
| <b>S2<sub>im-en</sub>-3H<sup>+</sup></b> (E, E', A) <span style="color: blue;">Fig 4c</span>     |                          | -29.82                           |
| <b>S2<sub>en-en</sub>-3H<sup>+</sup></b> (F, F', A)                                              |                          | -10.73                           |
| <b>S2<sub>im-im</sub>-3H<sup>+</sup></b> (F, F', A)                                              |                          | -10.21                           |
| <b>S2<sub>im-en</sub>-3H<sup>+</sup></b> (F, F', A)                                              | -11.59                   |                                  |
| <b>S2<sub>en-en</sub>-4H<sup>+</sup></b> (A, A', D, D')                                          | <b>S2-4H<sup>+</sup></b> | +6.98                            |
| <b>S2<sub>im-en</sub>-4H<sup>+</sup></b> (A, A', D, D')                                          |                          | +11.42                           |
| <b>S2<sub>im-im</sub>-4H<sup>+</sup></b> (A, A', D, D')                                          |                          | +2.16                            |
| <b>S2<sub>en-en</sub>-4H<sup>+</sup></b> (B, B', C, C')                                          |                          | +13.72                           |
| <b>S2<sub>im-en</sub>-4H<sup>+</sup></b> (B, B', C, C')                                          |                          | +8.21                            |
| <b>S2<sub>im-im</sub>-4H<sup>+</sup></b> (B, B', C, C')                                          |                          | +7.91                            |
| <b>S2<sub>en-en</sub>-4H<sup>+</sup></b> (B, B', D, D')                                          |                          | +7.02                            |
| <b>S2<sub>im-en</sub>-4H<sup>+</sup></b> (B, B', D, D')                                          |                          | +4.41                            |
| <b>S2<sub>im-im</sub>-4H<sup>+</sup></b> (B, B', D, D')                                          |                          | +2.52                            |
| <b>S2<sub>en-en</sub>-4H<sup>+</sup></b> (E, E', D, D')                                          |                          | -7.12                            |
| <b>S2<sub>im-en</sub>-4H<sup>+</sup></b> (E, E', D, D')                                          |                          | -8.34                            |
| <b>S2<sub>im-im</sub>-4H<sup>+</sup></b> (E, E', D, D')                                          |                          | -9.51                            |
| <b>S2<sub>en-en</sub>-4H<sup>+</sup></b> (C, C', A, A')                                          |                          | +9.42                            |
| <b>S2<sub>im-en</sub>-4H<sup>+</sup></b> (C, C', A, A')                                          |                          | +4.21                            |
| <b>S2<sub>im-im</sub>-4H<sup>+</sup></b> (C, C', A, A')                                          |                          | -1.67                            |
| <b>S2<sub>en-en</sub>-4H<sup>+</sup></b> (D, D', A, A')                                          |                          | +7.14                            |
| <b>S2<sub>im-en</sub>-4H<sup>+</sup></b> (D, D', A, A')                                          |                          | +2.43                            |
| <b>S2<sub>im-im</sub>-4H<sup>+</sup></b> (D, D', A, A')                                          |                          | -3.86                            |
| <b>S2<sub>en-en</sub>-4H<sup>+</sup></b> (E, E', A, A')                                          |                          | -26.74                           |
| <b>S2<sub>im-en</sub>-4H<sup>+</sup></b> (E, E', A, A')                                          |                          | -33.32                           |
| <b>S2<sub>im-im</sub>-4H<sup>+</sup></b> (E, E', A, A') <span style="color: blue;">Fig 4d</span> |                          | -38.15                           |
| <b>S2<sub>en-en</sub>-4H<sup>+</sup></b> (F, F', A, A')                                          |                          | -14.73                           |
| <b>S2<sub>im-en</sub>-4H<sup>+</sup></b> (F, F', A, A')                                          |                          | -16.23                           |
| <b>S2<sub>im-en</sub>-4H<sup>+</sup></b> (F, F', A, A')                                          |                          | -19.98                           |
